# Supplementary material
Source: PubMed Central journal article supplement (PMC7145731)
Supplement: NIHMS1047358-supplement-Supplemental_Material.pdf [file NIHMS1047358-supplement-Supplemental_Material.pdf]

## Supplementary Table 1

*Model Fits of Latent Profile Models of Parent-Child Ties*

| Number of class ( <i>k</i> ) | Likelihood ratio  | AIC              | BIC              | Entropy    | LMR LRT <i>p</i> -value |
|------------------------------|-------------------|------------------|------------------|------------|-------------------------|
| 2                            | -39,566.63        | 79,165.25        | 79,256.76        | .80        | < .001                  |
| 3                            | -38,992.12        | 78,028.24        | 78,154.07        | .83        | < .001                  |
| 4                            | -38,813.69        | 77,683.37        | 77,843.52        | .76        | .033                    |
| 5                            | -38,672.80        | 77,413.61        | 77,608.07        | .77        | .001                    |
| 6                            | -38,586.09        | 77,252.19        | 77,480.97        | .78        | .024                    |
| <b>7</b>                     | <b>-38,482.22</b> | <b>77,056.44</b> | <b>77,319.54</b> | <b>.80</b> | <b>.021</b>             |
| 8                            | -38,420.80        | 76,945.60        | 77,243.02        | .79        | .171                    |

*Notes.* Boldface type indicates the selected model.

AIC = Akaike information criterion; BIC = Bayesian information criterion; LMR LRT = Lo-Mendell-Rubin adjusted likelihood ratio tests (comparison with a (*k*-1) class model).

## Supplementary Table 2

*Mean Levels of Indicators and Membership Probabilities for Seven Typologies of Parent-Child Ties*

|                                                                  | <b><u>Type 1</u></b> | <b><u>Type 2</u></b>               | <b><u>Type 3</u></b>               | <b><u>Type 4</u></b>                       | <b><u>Type 5</u></b>                    | <b><u>Type 6</u></b>                    | <b><u>Type 7</u></b>                  |
|------------------------------------------------------------------|----------------------|------------------------------------|------------------------------------|--------------------------------------------|-----------------------------------------|-----------------------------------------|---------------------------------------|
| Variable                                                         | <i>Detached</i>      | <i>Not engaged–<br/>Harmonious</i> | <i>Not engaged–<br/>Conflicted</i> | <i>Low engaged helping–<br/>Ambivalent</i> | <i>Actively engaged–<br/>Conflicted</i> | <i>Actively helping–<br/>Ambivalent</i> | <i>Medium engaged–<br/>Harmonious</i> |
| Mean of raw scores (Mean of <i>T</i> -scores)                    |                      |                                    |                                    |                                            |                                         |                                         |                                       |
| In-person contact <sup>a</sup>                                   | 1.69 (32.57)         | 2.98 (38.68)                       | 4.38 (45.27)                       | 3.64 (41.80)                               | 7.37 (59.39)                            | 7.47 (59.88)                            | 5.81 (52.07)                          |
| Downward support <sup>b</sup>                                    | 1.36 (33.12)         | 2.81 (42.01)                       | 2.97 (41.96)                       | 4.93 (52.93)                               | 4.67 (51.95)                            | 5.90 (59.34)                            | 4.05 (49.64)                          |
| Upward support <sup>b</sup>                                      | 1.25 (32.73)         | 2.61 (41.46)                       | 2.61 (42.37)                       | 4.29 (54.10)                               | 4.13 (52.56)                            | 5.27 (59.96)                            | 3.78 (48.87)                          |
| Positive relationship quality <sup>c</sup>                       | 1.83 (25.82)         | 4.17 (51.85)                       | 2.87 (37.36)                       | 4.46 (55.06)                               | 3.01 (38.99)                            | 4.39 (54.30)                            | 4.30 (53.27)                          |
| Negative relationship quality <sup>c</sup>                       | 1.91 (48.83)         | 1.51 (44.41)                       | 2.55 (55.80)                       | 2.26 (52.63)                               | 3.02 (61.09)                            | 2.18 (51.77)                            | 1.78 (47.36)                          |
| Membership probability                                           | .06                  | .17                                | .07                                | .08                                        | .06                                     | .29                                     | .28                                   |
| Proportion of participants having that type of parent-child ties | .18                  | .39                                | .18                                | .18                                        | .15                                     | .64                                     | .61                                   |

*Notes.* Parent-child tie  $N = 2,252$  (nested within 633 participants).

<sup>a</sup>Rated from 1 (*less than once a year or never*) to 8 (*daily*). <sup>b</sup>Mean of 6 types of support rated from 1 (*less than once a year or never*) to 8 (*daily*). <sup>c</sup>Mean of 2 items rated from 1 (*not at all*) to 5 (*a great deal*).

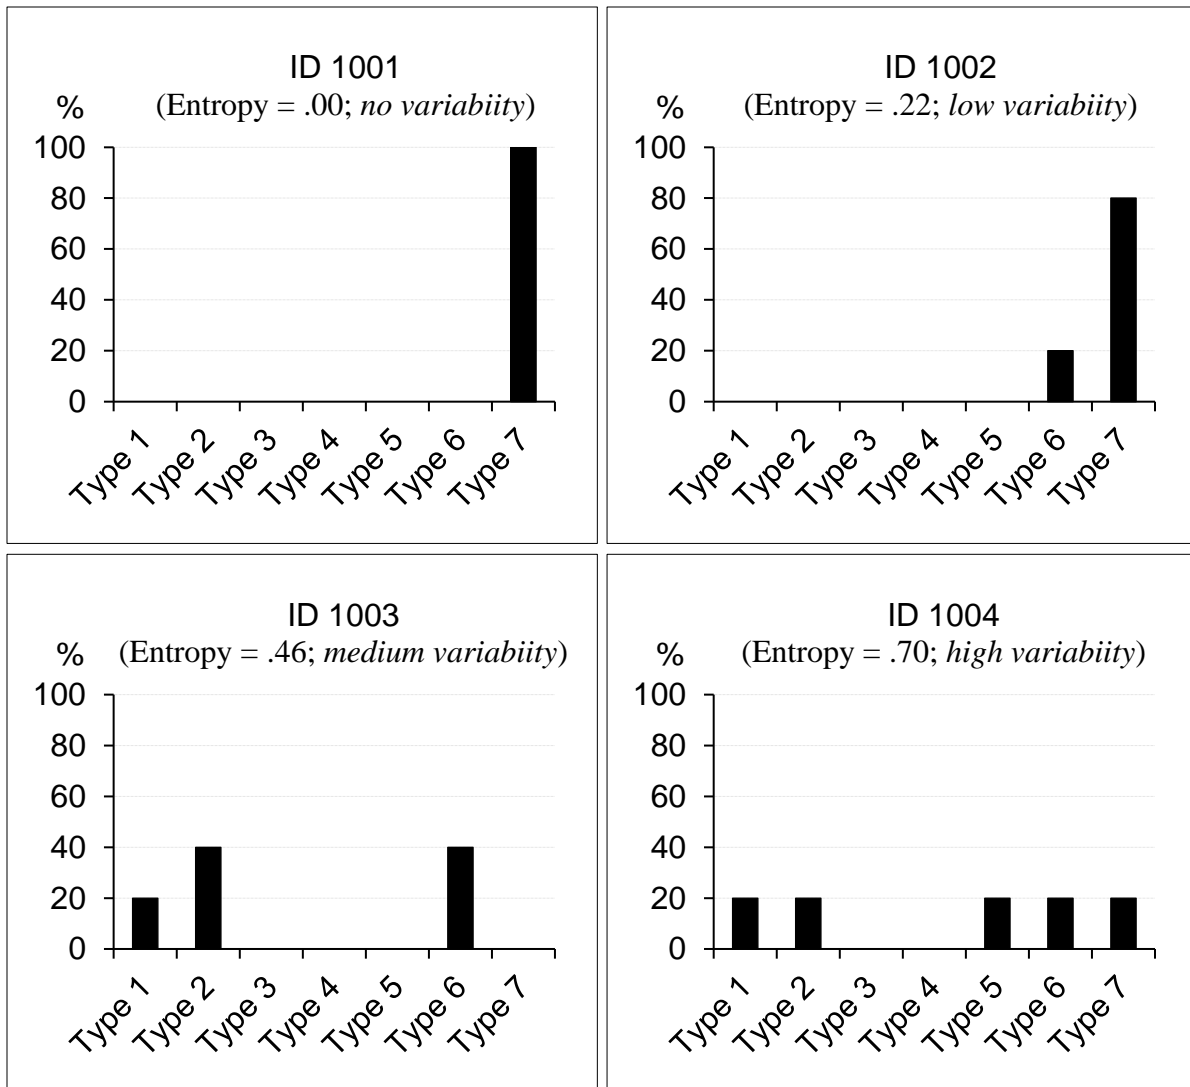

Supplementary Figure 1. Four examples of within-family variability over parent-child ties (based on entropy scores); Type 1 = *Detached*, Type 2 = *Not engaged–Harmonious*, Type 3 = *Not engaged–Conflicted*, Type 4 = *Low engaged helping–Ambivalent*, Type 5 = *Actively engaged–Conflicted*, Type 6 = *Actively helping–Ambivalent*, and Type 7 = *Medium engaged–Harmonious*. These participants reported five ties with parents and offspring within a family.
